# Supplementary material for: Elucidating the role of solvents in acid catalyzed dehydration of biorenewable hydroxy-lactones
Source: Royal Society of Chemistry journal article supplement (doi:10.1039/c9re00261h), 2020-01-01
Supplement: c9re00261h1.pdf [file c9re00261h1.pdf]

## Electronic Supplementary Information

### Elucidating the Role of Solvents in Acid Catalyzed Dehydration of Biorenewable Hydroxy-Lactones

Gourav Shrivastav,<sup>a,\*</sup> Tuhin S. Khan,<sup>a,\*</sup> Manish Agarwal,<sup>b</sup> M. Ali Haider<sup>a,\*</sup>

<sup>a</sup>*Renewable Energy and Chemical Laboratory, Department of Chemical Engineering, Indian Institute of Technology Delhi, Hauz Khas, New Delhi, India 110016*

<sup>b</sup>*Computer Service Center, Indian Institute of Technology Delhi, Hauz Khas, New Delhi, India 110016*

E-mail: gourav.shri7@gmail.com; tuhinsk@iitd.ac.in; haider@iitd.ac.in

Phone: +91 11 26591016

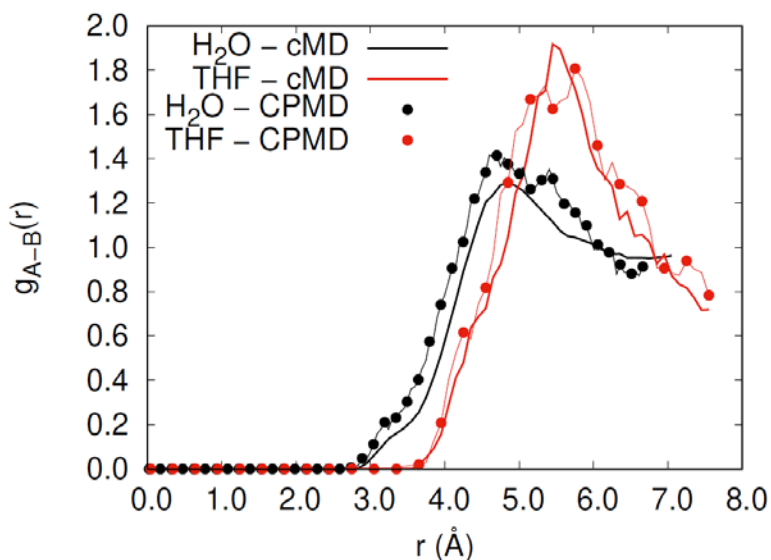

Figure S1: Comparison of radial distribution function (RDF) obtained from classical molecular dynamics (cMD) and Car-Parrinello molecular dynamics (CPMD) for HML-H<sup>+</sup> complex in bulk water and THF. The RDF is calculated using center of mass of HML-H<sup>+</sup> complex, oxygen atom of water molecules, and center of mass of THF molecules.
